# Supplementary material for: Room temperature, template-free synthesis of BiOI hierarchical structures: Visible-light photocatalytic and electrochemical hydrogen storage properties
Source: Royal Society of Chemistry journal article supplement (doi:10.1039/b922126c), 2010-01-01
Supplement: b922126c.pdf [file b922126c.pdf]

Supporting Information

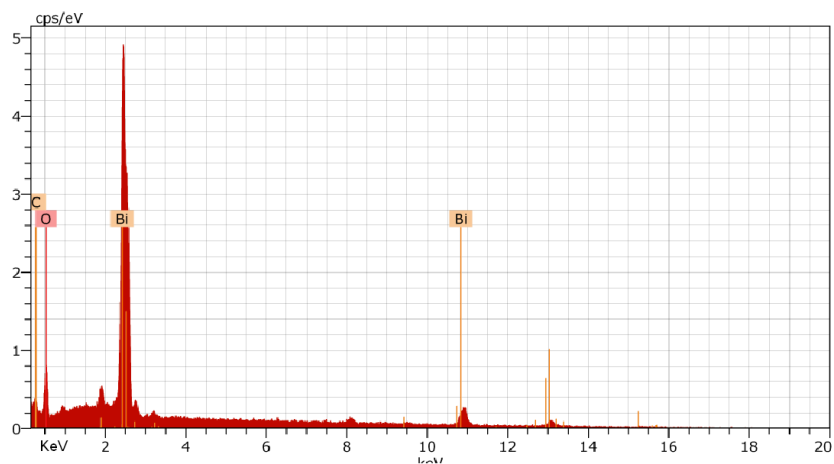

Fig. S1 The EDX spectrum of the Bi-EtOH precursor

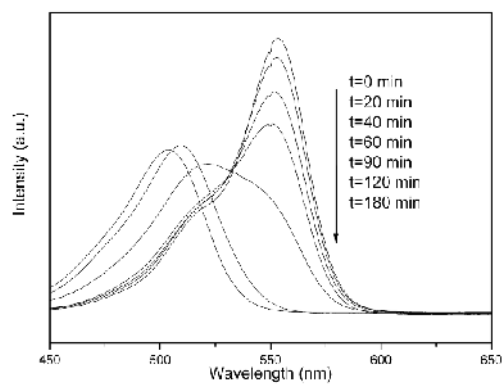

Fig. S2 The UV-vis absorption spectra of the RhB at different irradiation time.

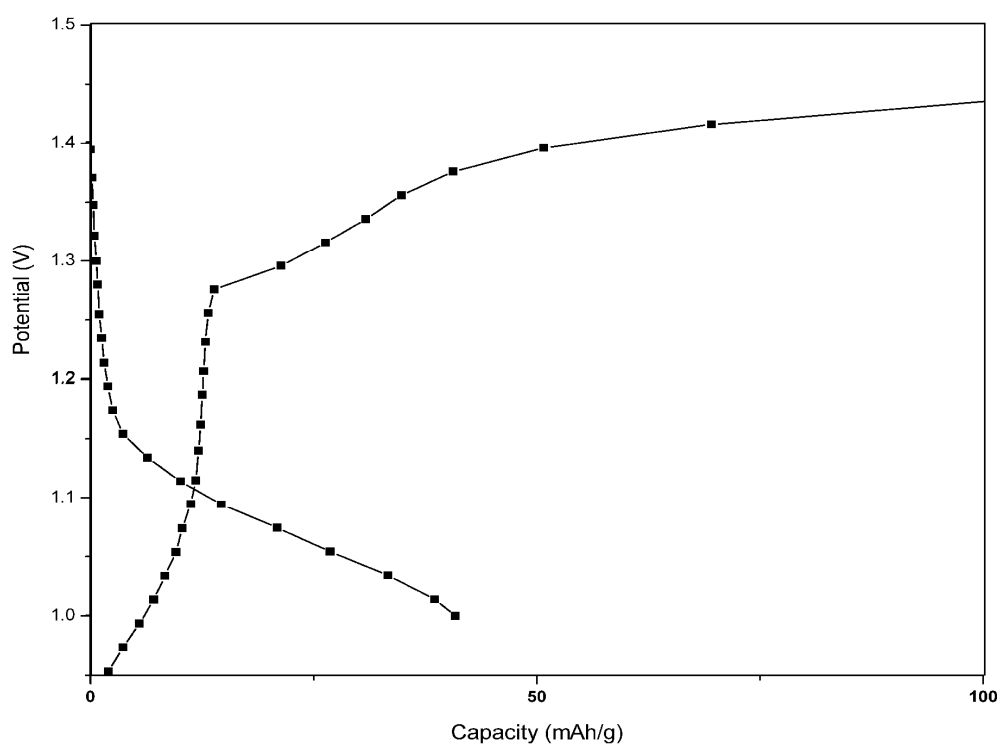

Fig. S3 The electrochemical hydrogen storage charge and discharge curve of the sample at room temperature.
